# Supplementary material for: Viral Diversity of House Mice in New York City
Source: PubMed Central journal article supplement (PMC5904411; doi:10.1128/mbio.01354-17), 2018-04-17

**Fig. S1.** Heatmap of UHTS reads mapped against viral sequences found in house mouse fecal pellets. Values represent the  $\log_{10}$  of specific virus-mapped reads per 10,000,000 reads normalized against total reads per pool. Rows represent individually barcoded pools of fecal pellets from 2-4 traps.

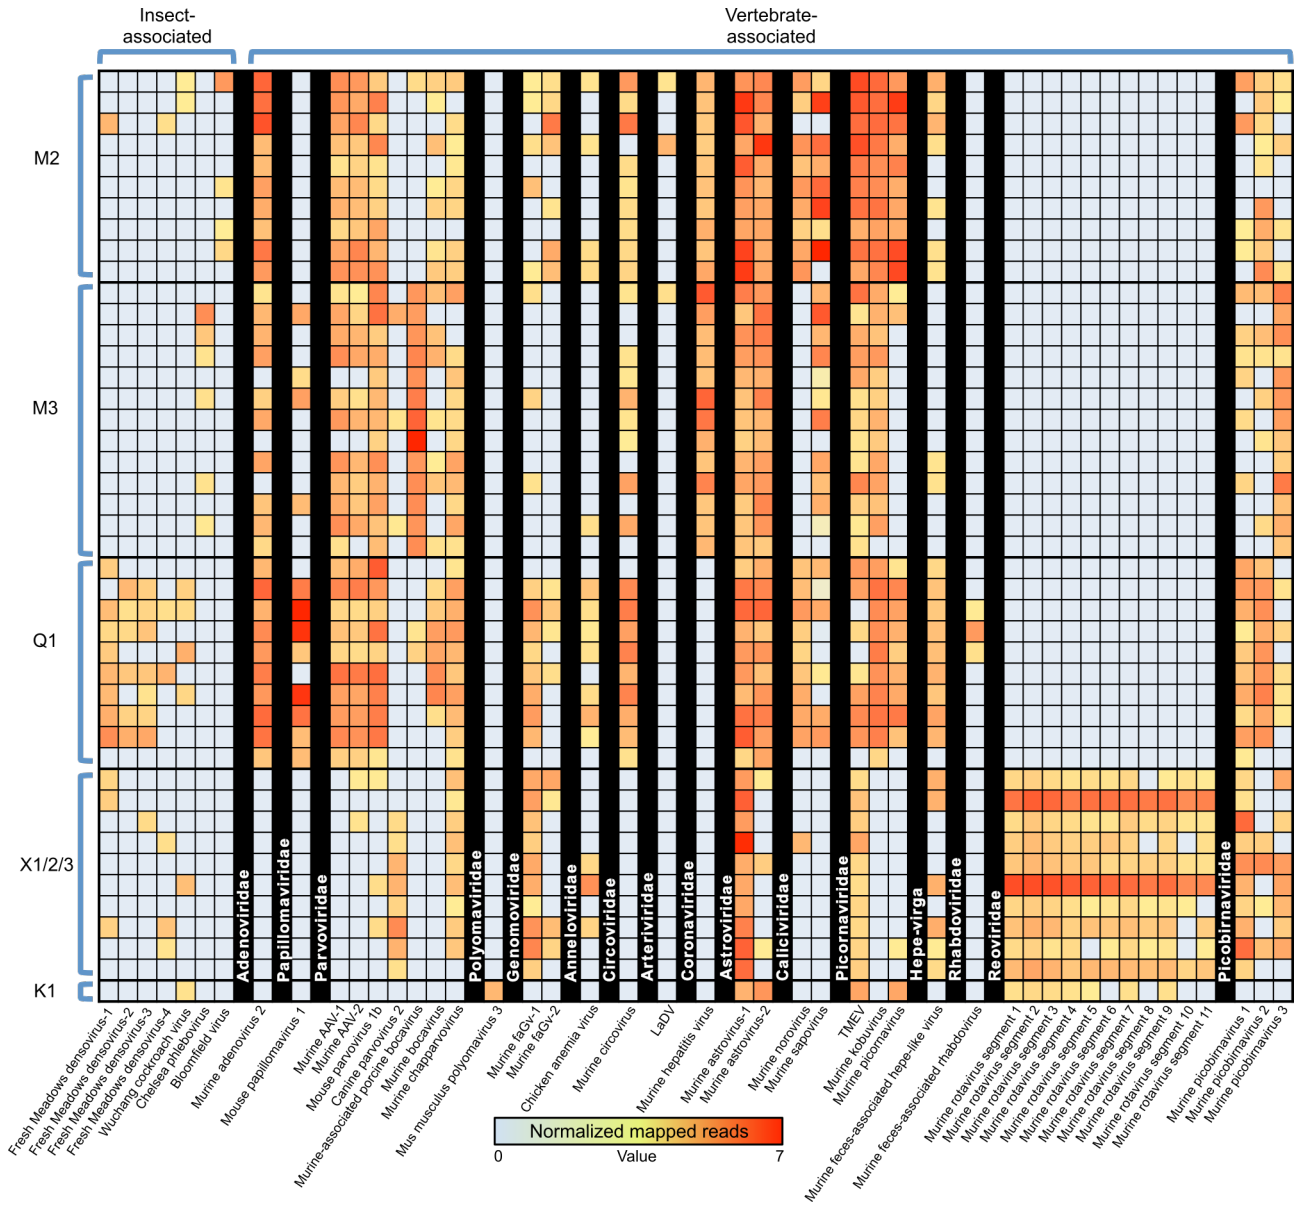

Supplement: mbo006173635sf1.pdf [file mbo006173635sf1.pdf]
