# Supplementary material for: Viral Diversity of House Mice in New York City
Source: PubMed Central journal article supplement (PMC5904411; doi:10.1128/mbio.01354-17), 2018-04-17

**Fig. S2.** Annotated genomes of viruses confirmed by Sanger sequencing in house mouse fecal pellets. Numbers represent nucleotide positions; orange arrows indicate open reading frames; green arrows indicate locations of post-translationally cleaved proteins for members of the viral family *Picornaviridae*.

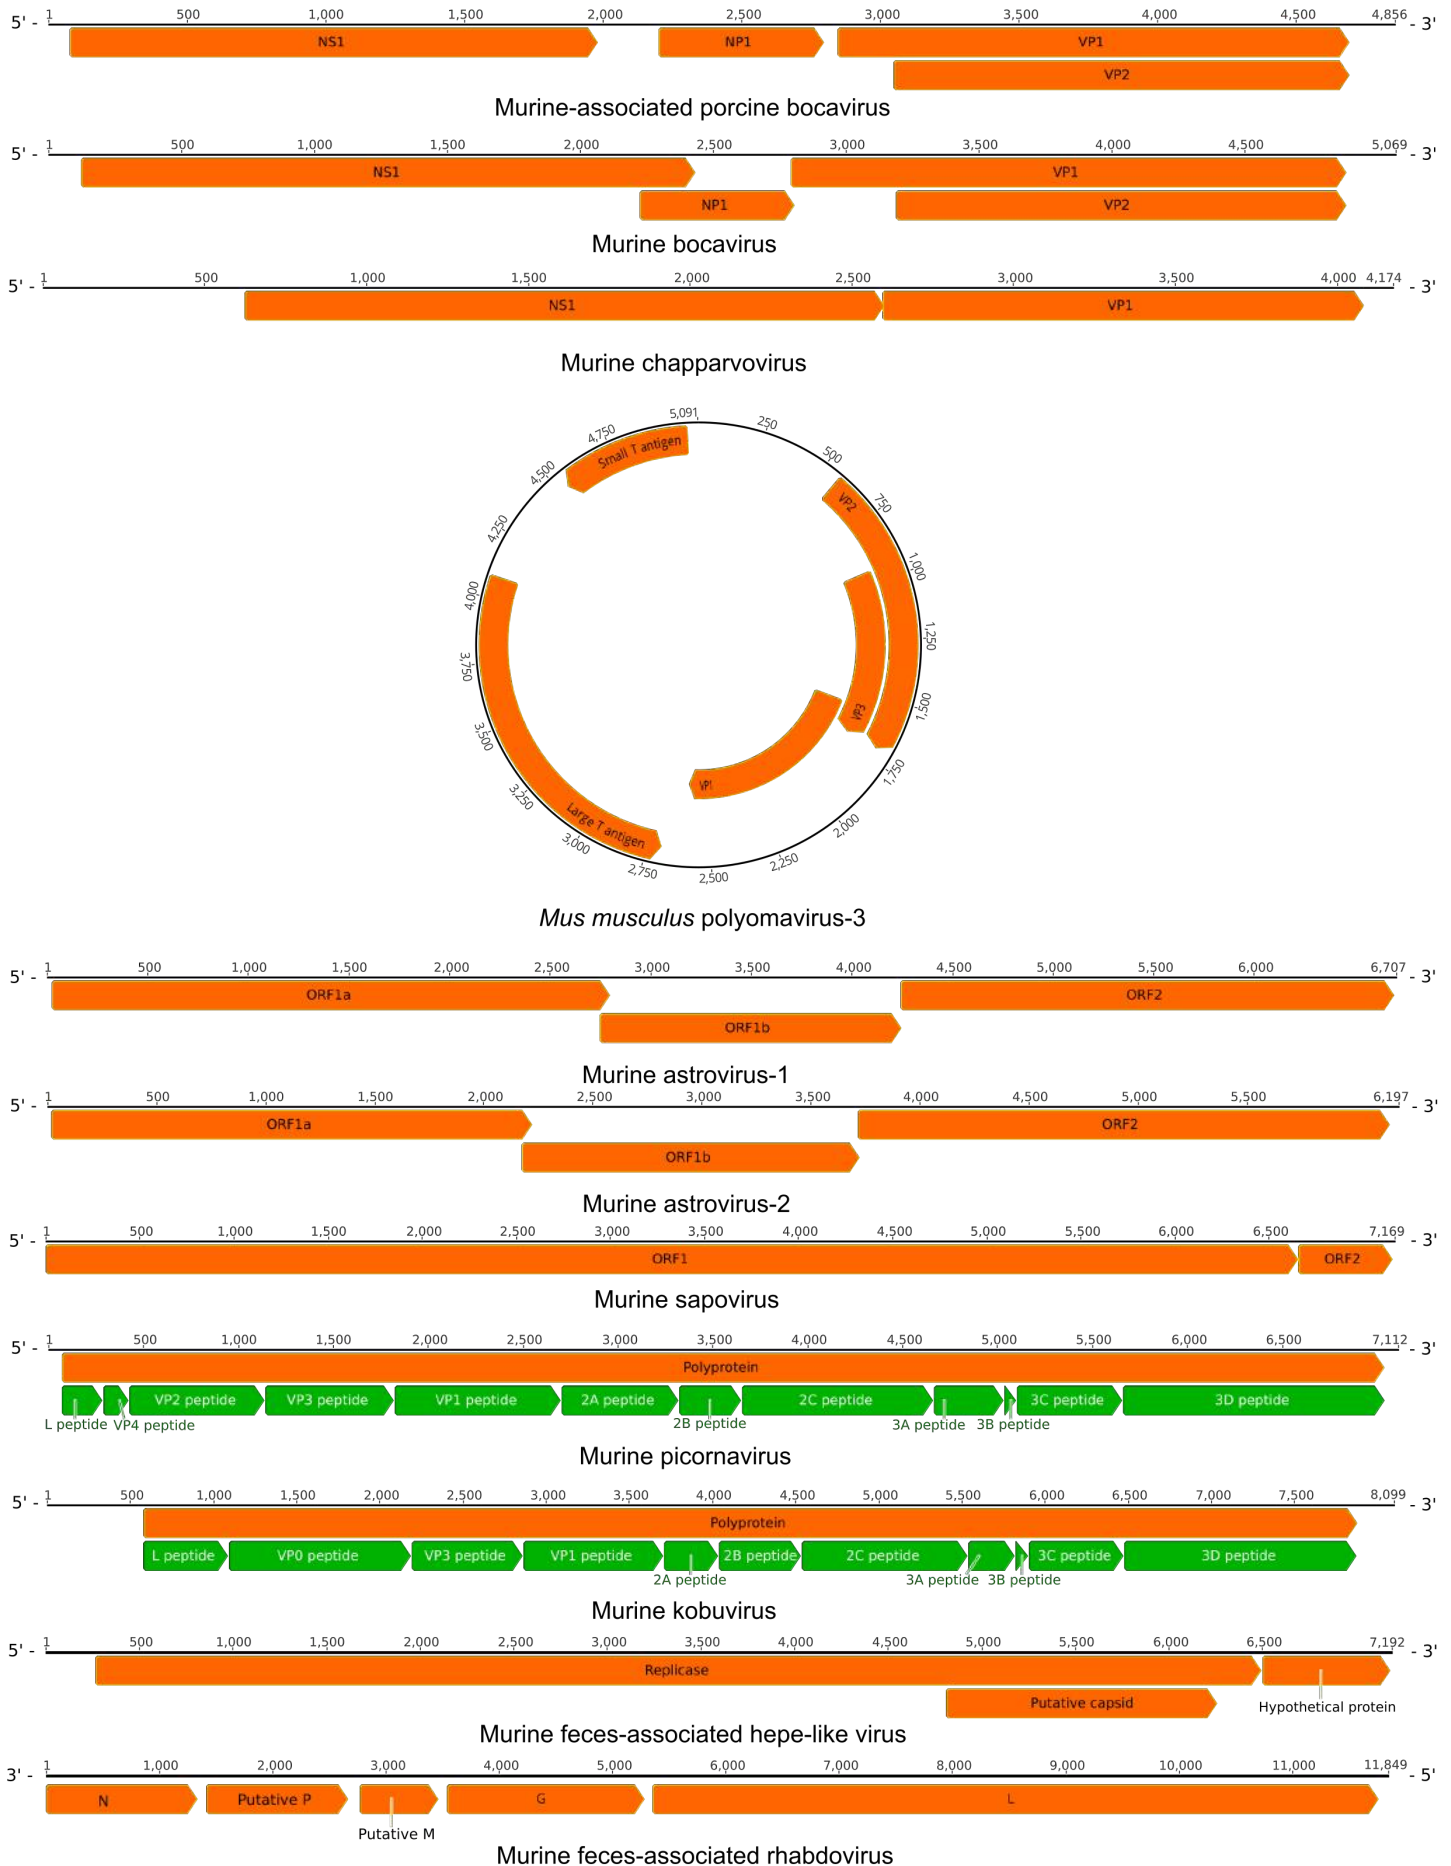

Supplement: mbo006173635sf2.pdf [file mbo006173635sf2.pdf]
