# Supplementary material for: Viral Diversity of House Mice in New York City
Source: PubMed Central journal article supplement (PMC5904411; doi:10.1128/mbio.01354-17), 2018-04-17

**Fig. S4.** Maximum likelihood phylogenetic tree of the capsid protein for representative members of the viral family *Astroviridae*. The scale bar represents units of substitutions per site. Genera are labeled with a black circle and recognized species are marked in grey boxes (MAstV, mammalian astrovirus; AAstV, avian astrovirus). Viruses identified in this study and the unclassified clades that they are assigned to are labeled in green. All bootstrap nodal support values are indicated if >70.

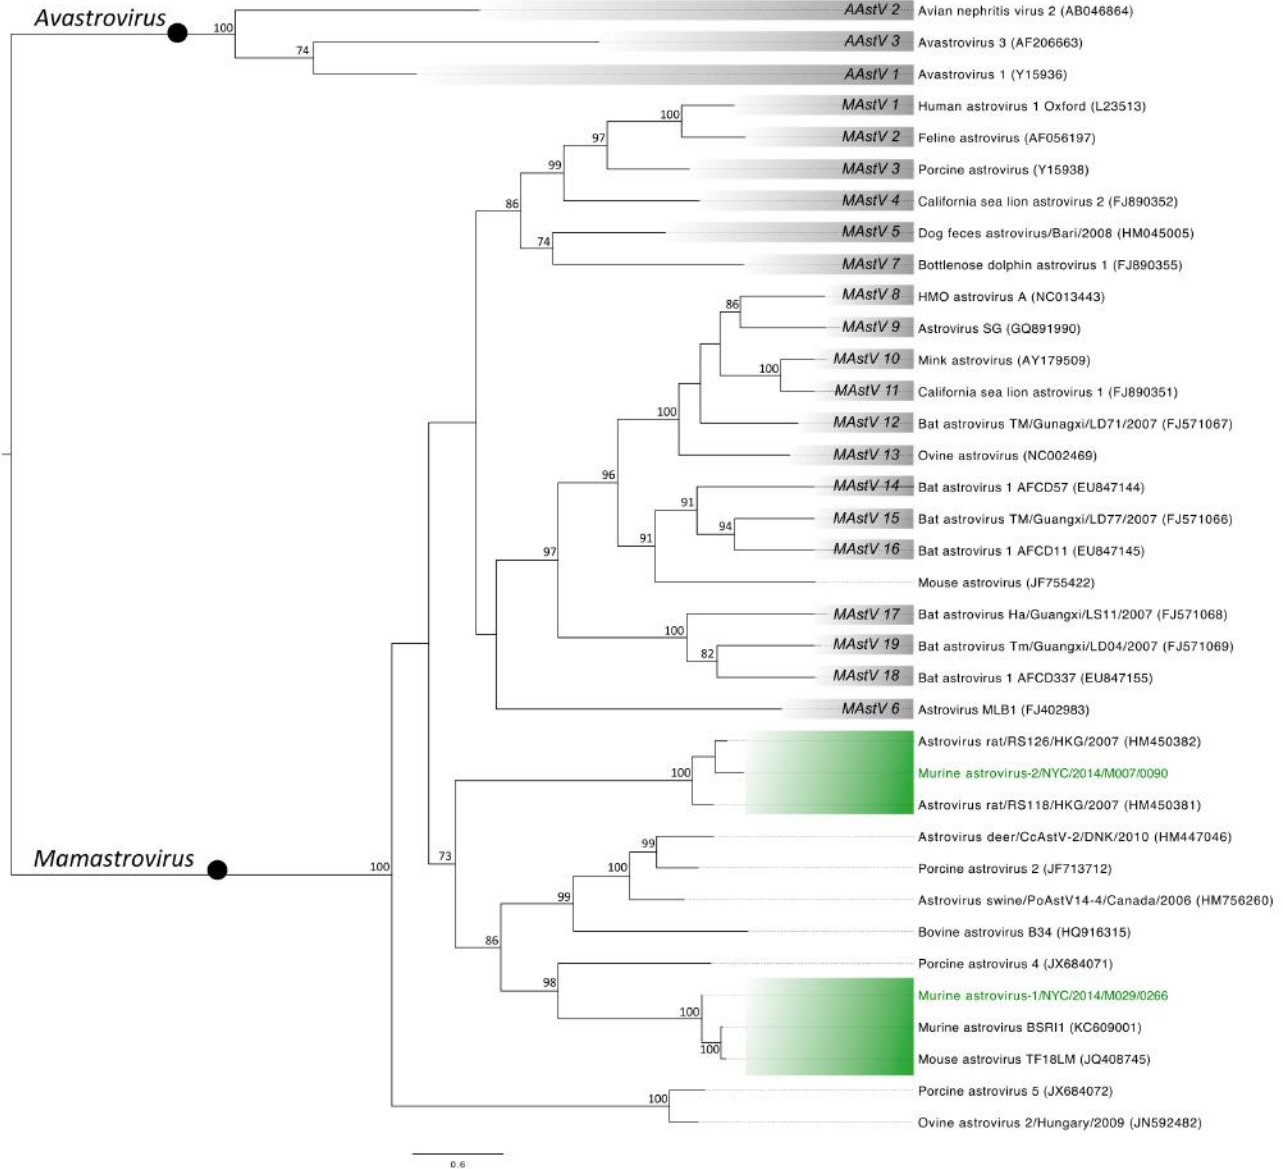

Supplement: mbo006173635sf4.pdf [file mbo006173635sf4.pdf]
