# Supplementary material for: Viral Diversity of House Mice in New York City
Source: PubMed Central journal article supplement (PMC5904411; doi:10.1128/mbio.01354-17), 2018-04-17

**Fig. S5.** Maximum likelihood phylogenetic tree of VP1 for members of the viral family *Caliciviridae*. The scale bar represents units of substitutions per site. Genera are labeled with a black circle. Representative viruses from currently recognized genogroups for the *Sapovirus* and *Norovirus* genera are shaded in grey boxes. Viruses identified in this study and the associated genogroups are labeled in green. All bootstrap nodal support values are indicated if >70.

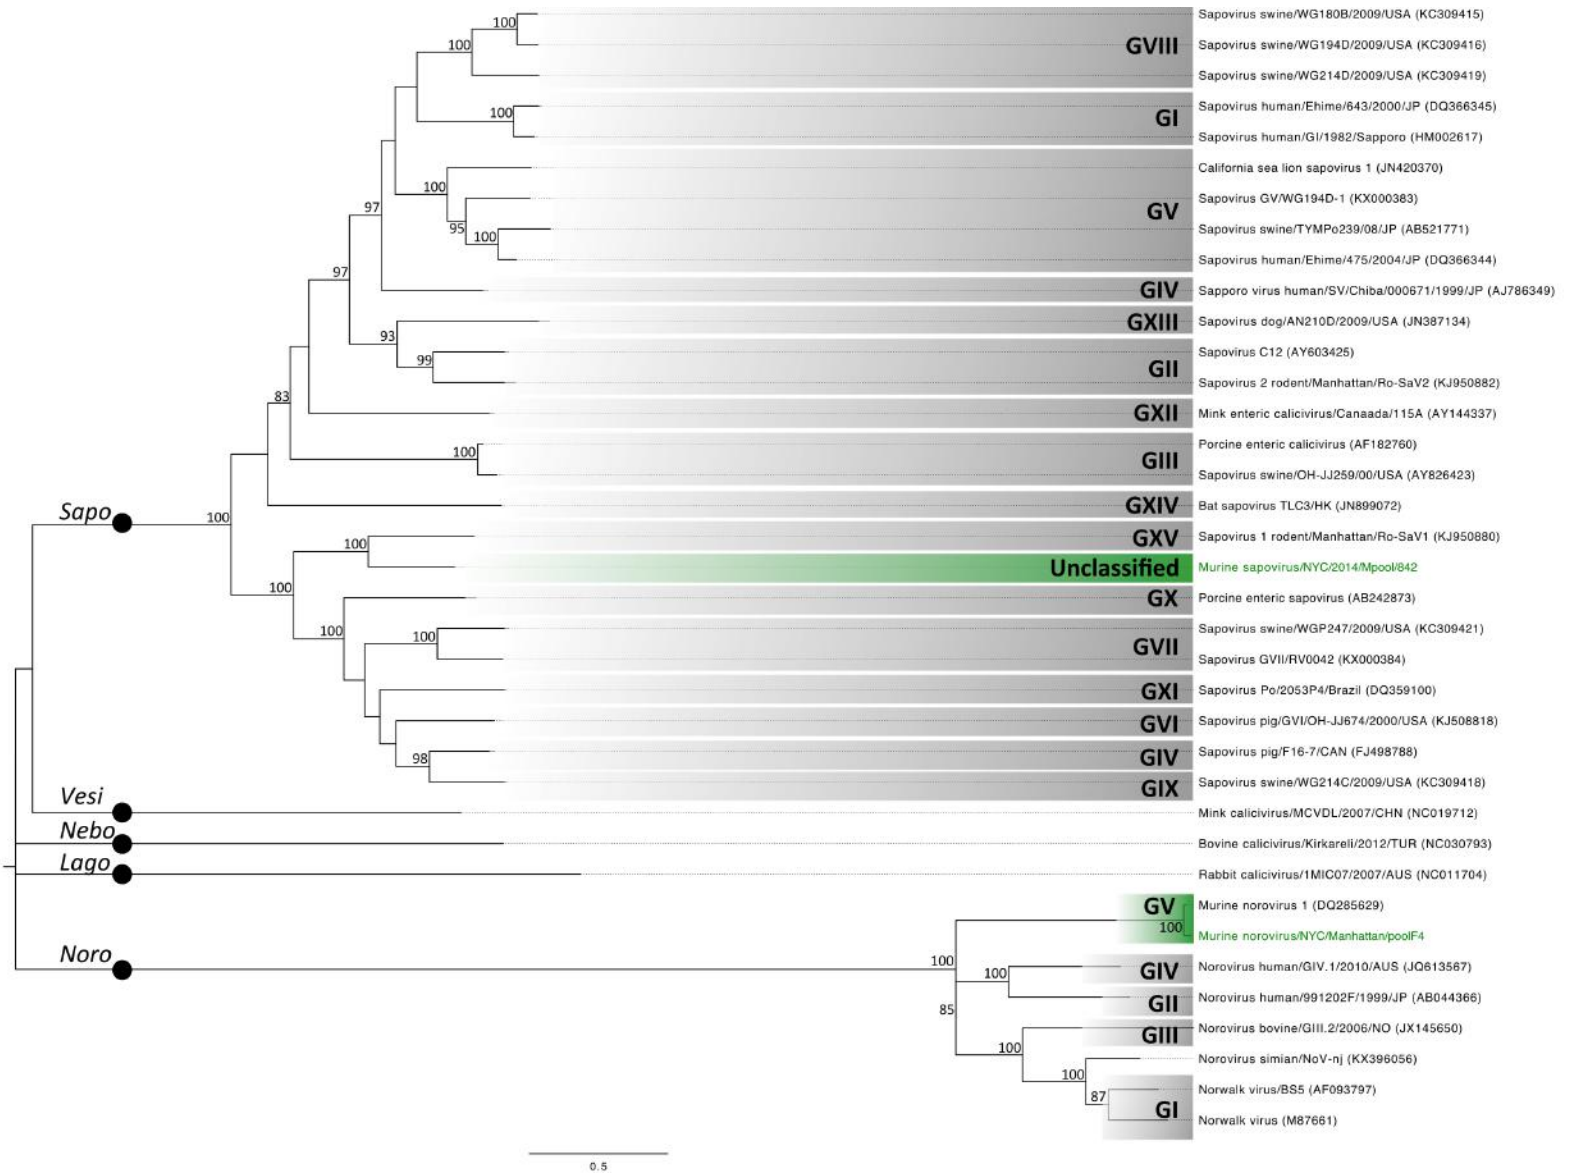

Supplement: mbo006173635sf5.pdf [file mbo006173635sf5.pdf]
