# Supplementary material for: Viral Diversity of House Mice in New York City
Source: PubMed Central journal article supplement (PMC5904411; doi:10.1128/mbio.01354-17), 2018-04-17

**Fig. S7.** Change in prevalence of fecal virus detections by PCR between two time points at two sites in NYC.

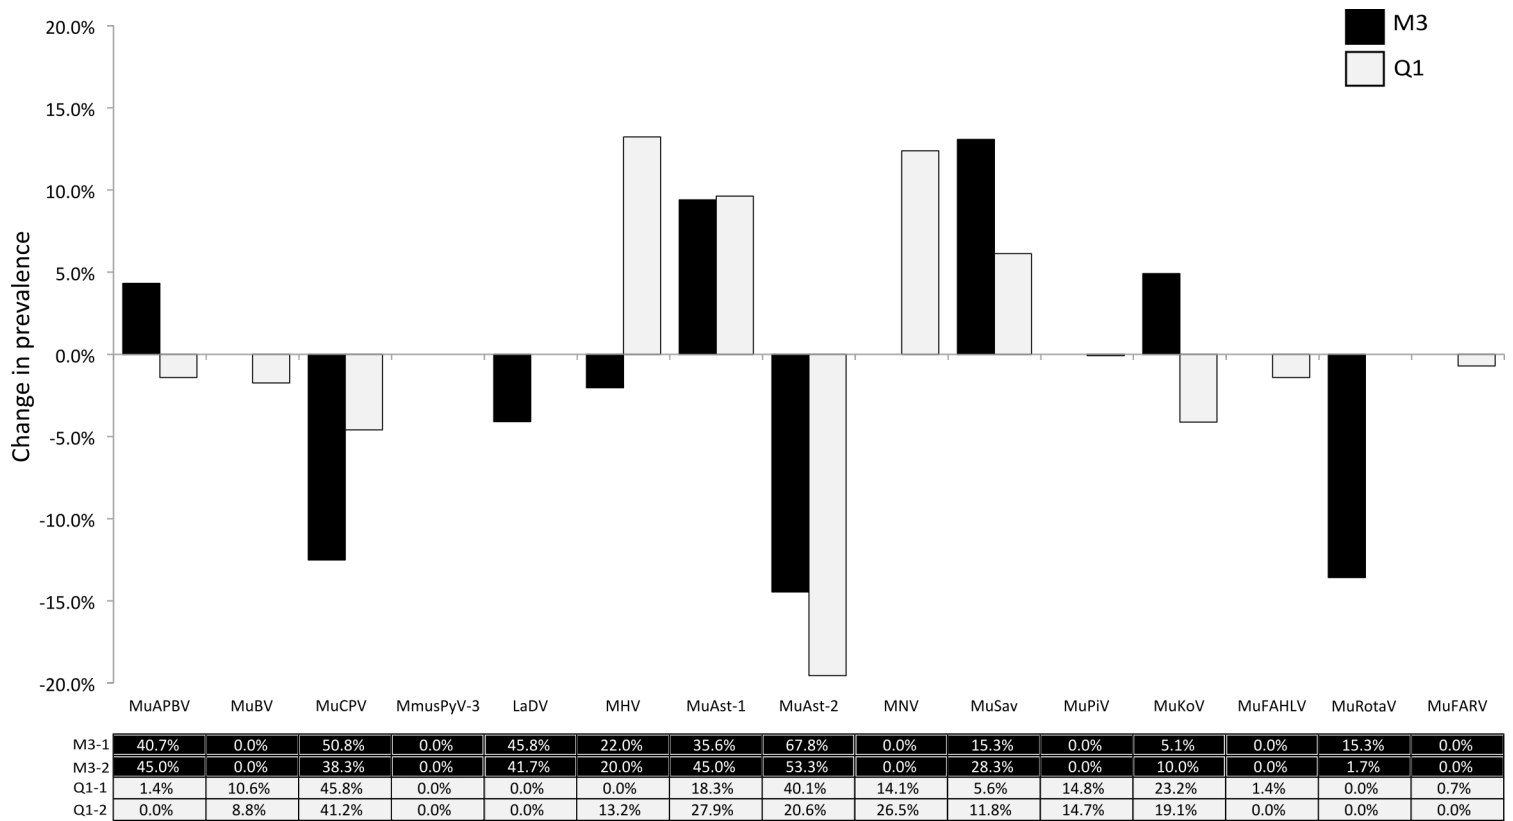

Supplement: mbo006173635sf7.pdf [file mbo006173635sf7.pdf]
