# Supplementary material for: Viral Diversity of House Mice in New York City
Source: PubMed Central journal article supplement (PMC5904411; doi:10.1128/mbio.01354-17), 2018-04-17
Supplement: mbo006173635st1.pdf [file mbo006173635st1.pdf]

**Supplemental Table 1. Pairwise association between virus prevalence and site**

| Virus   | Site pairwise comparison | OR    | 95% confidence interval |                     | p-value*               |
|---------|--------------------------|-------|-------------------------|---------------------|------------------------|
|         |                          |       | Lower limit             | Upper limit         |                        |
| MuAPBV  | M3 vs M2                 | 54.4  | 7.1                     | 7.0x10 <sup>3</sup> | 2.1x10 <sup>-7</sup>   |
|         | M3 vs Q1                 | 60.0  | 19.3                    | 300.1               | <1.0x10 <sup>-11</sup> |
|         | M3 vs X1                 | 57.0  | 7.5                     | 7.3x10 <sup>3</sup> | 9.3x10 <sup>-8</sup>   |
| MuBV    | Q1 vs M3                 | 28.6  | 3.7                     | 3.7x10 <sup>3</sup> | 8.5x10 <sup>-5</sup>   |
| MuCPV   | Q1 vs X1                 | 5.9   | 2.4                     | 17.4                | 5.5x10 <sup>-5</sup>   |
| LaDV    | M3 vs M2                 | 9.6   | 2.7                     | 51.1                | 1.5x10 <sup>-4</sup>   |
|         | M3 vs Q1                 | 240.2 | 33.4                    | 3.1x10 <sup>4</sup> | <1.0x10 <sup>-11</sup> |
|         | M3 vs X1                 | 41.3  | 5.3                     | 5.3x10 <sup>3</sup> | 6.5x10 <sup>-5</sup>   |
| MHV     | M3 vs M2                 | 47.3  | 5.8                     | 6.2x10 <sup>3</sup> | 6.5x10 <sup>-5</sup>   |
|         | M3 vs Q1                 | 8.7   | 3.8                     | 21.4                | 6.8x10 <sup>-8</sup>   |
|         | M3 vs X1                 | 31.9  | 4.0                     | 4.1x10 <sup>3</sup> | 7.0x10 <sup>-5</sup>   |
| MuAst-1 | M3 vs Q1                 | 2.6   | 1.6                     | 4.4                 | 2.7x10 <sup>-4</sup>   |
| MuAst-2 | M2 vs X1                 | 69.2  | 8.3                     | 9.1x10 <sup>3</sup> | 5.5x10 <sup>-7</sup>   |
|         | M3 vs X1                 | 103.4 | 13.6                    | 1.3x10 <sup>4</sup> | 5.0x10 <sup>-11</sup>  |
|         | Q1 vs X1                 | 47.3  | 6.4                     | 6.0x10 <sup>3</sup> | 2.4x10 <sup>-7</sup>   |
| MNV     | M2 vs M3                 | 141.0 | 16.6                    | 1.9x10 <sup>4</sup> | 4.4x10 <sup>-9</sup>   |
|         | M2 vs X1                 | 37.7  | 4.4                     | 5.0x10 <sup>3</sup> | 9.4x10 <sup>-5</sup>   |
|         | Q1 vs M3                 | 74.1  | 10.0                    | 9.5x10 <sup>3</sup> | 8.2x10 <sup>-10</sup>  |
| MuSaV   | M3 vs Q1                 | 4.4   | 2.2                     | 9.2                 | 2.7x10 <sup>-5</sup>   |
|         | M3 vs X1                 | 26.8  | 3.5                     | 3.5x10 <sup>3</sup> | 1.6x10 <sup>-4</sup>   |
| MuPiV   | Q1 vs M3                 | 38.2  | 5.1                     | 4.9x10 <sup>3</sup> | 3.1x10 <sup>-5</sup>   |
| MuKoV   | Q1 vs X1                 | 25.6  | 3.5                     | 3.3x10 <sup>3</sup> | 7.2x10 <sup>-5</sup>   |
| MuRotaV | M3 vs Q1                 | 42.7  | 5.2                     | 5.5x10 <sup>3</sup> | 2.4x10 <sup>-5</sup>   |

Odds ratios (OR) were calculated using Firth logistic regression analysis. Only statistically significant associations shown (family-wise error rate controlled at 0.05 level)
