# Supplementary material for: Viral Diversity of House Mice in New York City
Source: PubMed Central journal article supplement (PMC5904411; doi:10.1128/mbio.01354-17), 2018-04-17
Supplement: mbo006173635st2.pdf [file mbo006173635st2.pdf]

**Supplemental Table 2. PCR primers and cycling conditions**

| Agent                                   | Target gene    | Forward primer (5'-3')     | Reverse primer (5'-3')        | Product size (nt) | AT (°C) | Reference  |
|-----------------------------------------|----------------|----------------------------|-------------------------------|-------------------|---------|------------|
| <b>Viruses</b>                          |                |                            |                               |                   |         |            |
| MuAPBV                                  | NS1            | ACAAGAGATTGCGGATTGGC       | CTTACCTCCGTCGTCCCAA           | 247               | 60-55   | This study |
| MuBV                                    | NS1            | ATCTGGTGGGAGGAGTGTC        | AACAGTCGACTAGCCAGTCG          | 298               | 60-55   | This study |
| MuCPV                                   | NS1            | CCACTAATCATGCTCCCTGGC      | ACCTTCTGCTGCAGGTAGTGG         | 317               | 60-55   | This study |
| MmusPyV-3                               | VP1            | GGTACTGCTACAGGACTGAC       | CTTGAAGGGTCAGGAATCCAG         | 246               | 60-55   | This study |
| LaDV                                    | Polyprotein-1b | TACCTGTTGAGTGTGGTCC        | CCTCAATCAACTGTCTCCC           | 355               | 60-55   | This study |
| MHV                                     | Orf1b          | GCGTTCTCTTGATAGAGCGC       | GAACTACAGACAACGCAGGC          | 271               | 60-55   | This study |
| MuAst-1                                 | Orf1b/2        | GAAACTCTTGAGCCTGCAGC       | CAGTCCGAACAGTTGTTGTC          | 321               | 60-55   | This study |
| MuAst-2                                 | Orf1b/2        | TCACCTGGAGGCTCTCTGG        | CATTATTAGGCTGGACGCGC          | 238               | 61-56   | This study |
| MNV                                     | VP1            | CACCTCTCAGCCATGTAYAC       | AGTGGCGTGTACAGCATGC           | 287               | 60-55   | This study |
| MuSaV                                   | VP1            | TCAGGGTCTCKGTSTCGG         | CCCAGATGCCAAGRGTCTG           | 225               | 62-57   | This study |
| MuPiV - M                               | VP1            | CATCCAGGTACAGAGAGCC        | GGTGTAGTGGGCATGTACC           | 342               | 62-57   | This study |
| MuPiV - Q                               | VP1            | GCCAACTTCATGTGCAAGC        | GGTGTGTSGGCATGTACC            | 371               | 62-57   | This study |
| MuPiV - K                               | VP1            | GCCAACTTCATGTGCAAGC        | GGAGTAGTGGGCATGTACC           | 371               | 60-55   | This study |
| MuKoV                                   | Polyprotein-2b | TGACCGCTGACGCAGAGAC        | YTTGGCRAGCCAGGTGAGG           | 269               | 60-55   | This study |
| MuFAHLV - MQ                            | Replicase      | AAGGARAGTAARTGTGCC         | TTTTGCTCCAYGCSGAGAC           | 349               | 58-53   | This study |
| MuFAHLV - X                             | Replicase      | AAGGAAAGTAAATGTGCC         | TTTTGCTCCACGCAGAGAC           | 349               | 57-52   | This study |
| MuRotaV                                 | VP1            | TGGGATCAAGCTGCAGTGC        | CCTGATAGAGACATGAACGCC         | 260               | 60-55   | This study |
| MuFARV                                  | L protein      | TCTGGTGAAAGAGGAGGTC        | TCCTTCTACTATCCCAGGG           | 196               | 60-55   | This study |
| Arenavirus                              | L segment      | AGAATYAGTGAAAGGGARAGYAAATC | CACATCATTGGTCCCCATTTACTRTGATC | 395               | 55      | [1]        |
| LCMV                                    | S segment      | CGCACAGTGGATCCTAGGC        | CWAGRTRCGCYGCAARRGAC          | 380               | 64-59   | This study |
| <b>Housekeeping</b>                     |                |                            |                               |                   |         |            |
| GAPDH                                   |                | TGACGTGCCGCTGGAGAAA        | AGTGTAGCCCAAGATGCCCTTCAG      | 98                | 60*     | [2]        |
| <i>M. musculus</i> mitochondrial d-loop |                | TGAATTGGAGGACAACCAGT       | TTATAAGGCCAGGACCAAAC          | 1240              | 58-53   | [3]        |

AT, PCR annealing temperature; AT\* listed as xx-yy indicates touchdown PCR (delta 0.5°C/cycle for 10 cycles);

\*assay performed as a SYBR-green real-time PCR with 60s combined anneal and extension

1. Vieth, S., et al., *RT-PCR assay for detection of Lassa virus and related Old World arenaviruses targeting the L gene*. Trans R Soc Trop Med Hyg, 2007. **101**(12): p. 1253-64.
2. Mamo, S., et al., *Quantitative evaluation and selection of reference genes in mouse oocytes and embryos cultured in vivo and in vitro*. BMC Dev Biol, 2007. **7**: p. 14.
3. Gabriel, S.I., et al., *Of mice and 'convicts': origin of the Australian house mouse, *Mus musculus**. PLoS One, 2011. **6**(12): p. e28622.
